# Supplementary material
Source: HighWire-hosted journal article supplement (https://jnm.snmjournals.org/highwire/filestream/94697/field_highwire_adjunct_files/0/149021Supplemental_Data.pdf)
Supplement: 149021Supplemental_Data.pdf [file 149021Supplemental_Data.pdf]

### **<sup>18</sup>F-FPRGD2 radiosynthesis**

<sup>18</sup>F-FPRGD2 was produced following a published method in compliance with cGMP regulations. The radiosynthesis of N-succinimidyl 4-<sup>18</sup>F-fluorobenzoate (<sup>18</sup>F-SFB) was automatically performed on a commercial synthesis module (GE Healthcare FASTlab) with a radiochemical yield (decay-corrected) of 32% and a radiochemical purity of more than 96%. The coupling reaction between <sup>18</sup>F-SFB and the FPRGD2 was performed using a second disposable cassette clamped onto the FASTlab. The crude product was purified on an HPLC system; the fraction containing the pure <sup>18</sup>F-FPRGD2 was collected on the FASTlab, diluted with saline, and then concentrated on a C18 cartridge. The cartridge was eluted with ethanol and saline, and the eluted solution was sterilized through a 0.22- $\mu$ m filter. The mean activity of the purified <sup>18</sup>F-FPRGD2 obtained was in the range of 3,750 MBq in 130 min with an overall radiochemical yield (from the <sup>18</sup>F-fluoride) of 13% (decay-corrected), radiochemical purity of 98%, and specific activity of  $140 \pm 40$  TBq/mmol.

### **<sup>18</sup>F-FPRGD2 PET/CT**

All patients fasted for 6 h before <sup>18</sup>F-FPRGD2 injection. The PET/CT images were acquired on a Gemini PET/CT system (Philips Medical Systems), TF ( $n = 18$ ) or Big Bore ( $n = 9$ ), and the acquisition started 60 min (median, 60 min; range, 59–86 min) after intravenous injection of a mean activity ( $\pm$ SD) of  $309 \pm 31.4$  MBq of <sup>18</sup>F-FPRGD2. The mean injected mass of the active pharmaceutical ingredient was  $7 \pm 4.9$   $\mu$ g. A low-dose CT scan (5-mm slice thickness; tube voltage, 120 kV; tube current–time product, 50–80 mAs depending on the patient's weight) followed by the PET emission scan of 3 min per bed position was performed. Data were reconstructed using time of flight, including correction for decay, scatter, randoms, and attenuation (CT data were used for attenuation correction).

## **Statistical Analyses**

The intraclass correlation coefficient was used to estimate the observers' agreement on PET/CT images. Correlations between quantitative variables were calculated after logarithmic or logit transformations to normalize the distributions. A multivariate regression was applied to estimate  $SUV_{\max}$  and  $SUV_{\text{mean}}$  with respect to tissue parameters. Results were considered to be significant at the 5% level ( $P < 0.05$ ). The generalized linear mixed model was applied to take into account multiple variables in a single patient. The coefficient of variation (CV) was calculated to estimate the variability of  $SUV_{\max}$  and tissue parameter levels in biopsy samples. Calculations were done using SAS, version 9.2 (SAS Institute).

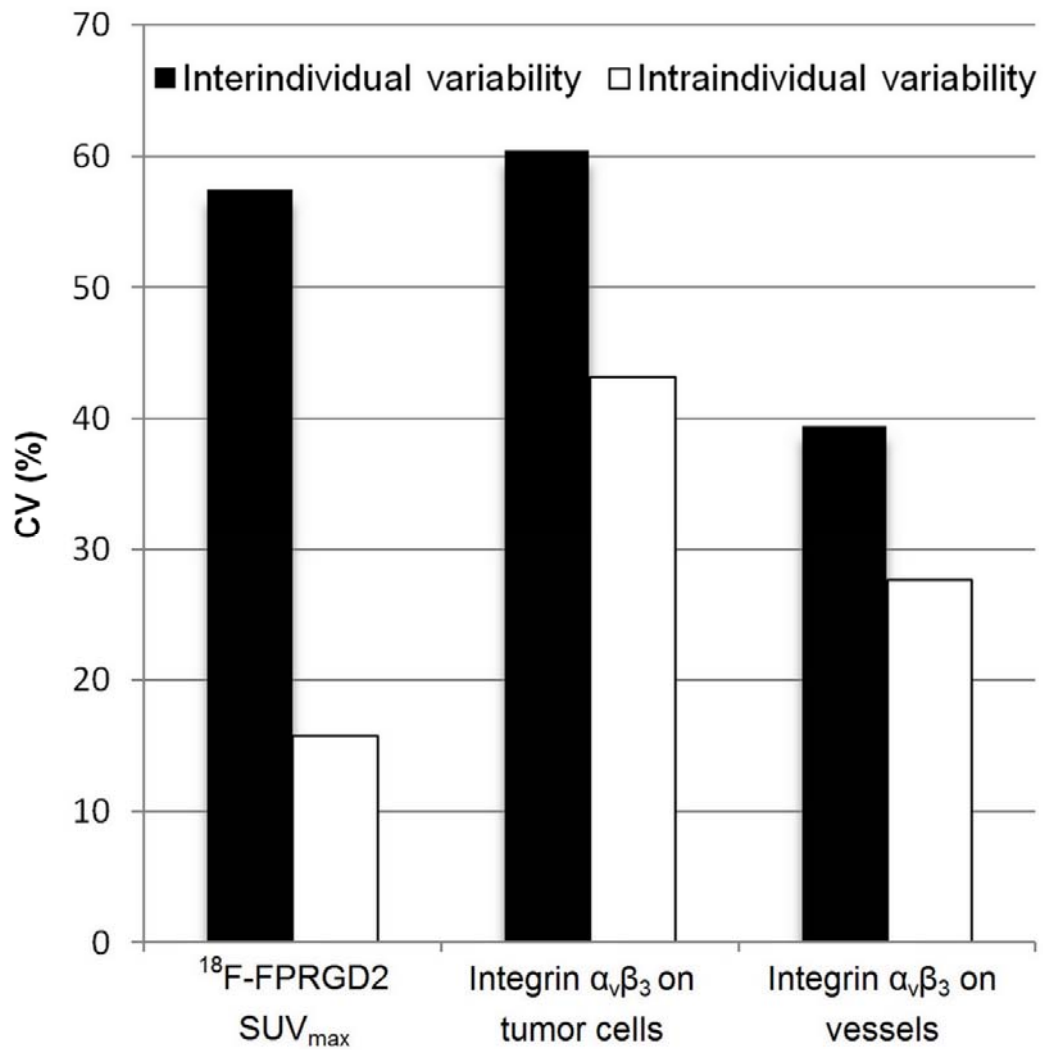

**Supplemental Figure 1.** Shown are the coefficients of variation of  $^{18}\text{F-FPRGD2}$   $\text{SUV}_{\text{max}}$  and the expression of integrin  $\alpha_v\beta_3$  on tumor cells and on vessels in renal tumors.

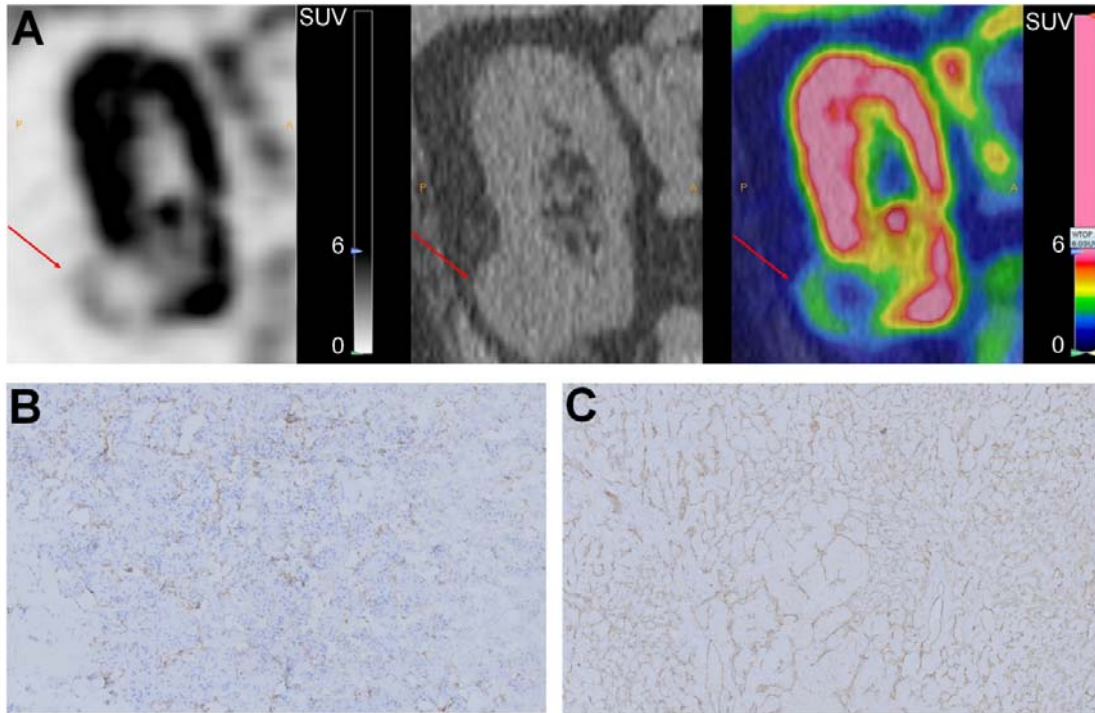

**Supplemental Figure 2.**  $^{18}\text{F}$ -FPRGD2 PET/CT images (A) of a patient with a ccRCC and high  $^{18}\text{F}$ -FPRGD2 tumor uptake ( $\text{SUV}_{\text{max}}$ , 3.9) at the periphery of the tumor due to high integrin  $\alpha_v\beta_3$  expression in vessels only (B: brown staining of integrin  $\alpha_v\beta_3$ ; C: brown staining of CD31).
